# Supplementary material for: Insulation of a synthetic hydrogen metabolism circuit in bacteria
Source: Springer Nature journal article supplement (doi:10.1186/1754-1611-4-3), 2010-02-25
Supplement: Additional file 1 [file 1754-1611-4-3-s1.pdf]

## Supplementary Information for Agapakis et. al. “Insulation of a synthetic hydrogen metabolism circuit in bacteria”

>Cr. HydA1; AAL23572

gaattcgcggccgcttctagagctgcaccagccgcagaagctcctttgtctcatgttcaacaggccttag  
ccgagcttgcaaaaccaaaggatgaccctactagaaaacacgtatgtgtccaagtggccccagctgcttag  
ggtagcaattgctgaaacacttggtttggccccctggagcaaccactccaaagcagttagctgagggccta  
agaaggcttggttttgatgaagtgttcgacacattgtttggagccgatttaaccataatggaagagggt  
cagaattgttacatagactaactgaacaccttgaggcacatcctcactccgacgaaccattgcctatggt  
cacaagttgctgtccaggttggatcgctatggttagaaaaagctatcctgatctaattccatcagtgagc  
tcatgcaagtcccctcaaattgatgttggccgcaatgggttaaaagttatttagctgagaagaaaggatag  
ccccaaaggatattgtaattggtcagcatcatgccatgtaccagaaaacaatctgaagcagacagggattg  
gttttgcgcttgacgctgatcctactcttagacagttggatcatgtgattacaaccgcttgagttaggaaat  
atattcaaggaaagaggcatcaacctagccgaacttccagaggggtgaatgggacaatcctatgggagtag  
gttcaggcgcaggtgtcttggtttggaaactacaggcggcgatggaagctgctttaaggactgcctacga  
gctattcaccggtacaccattgcctagattatcccttagtgaagttagggaatggatgggtattaaagaa  
actaaccattaccatgggtaccagcacctggctctaagtttgaggaattggttaaacatagagctgccgcaa  
gagctgaagccgcagctcacggaacaccaggctcctctagcatgggacggcggtgctggattcactagcga  
ggatggtagggggcgcataacattgagagtcgccgttgcaaatggattaggtaacgctaaaaagcttatac  
accaaaatgcaagccggcgaagcaaaagtatgattttgtggagattatggcttgtccagccggatgtggtg  
gtggagggcggacaacctagatcaactgacaaaagcaataaacacagaagaggcaagctgccctatacaattt  
ggatgaaaaatccactttaagaagaagtcataaaaaccatctatcagggagctttatgacacctacttg  
ggtgaaccttttaggtcacaaggcacatgaactattgacacacattatgtagctggcggagctcagggaaa  
aagatgaaaagaaaactagtagcggccgctgcag

>Cr. HydEF; AAS92601

gaattcgcggccgcttctagagctgcacatgcctctgcttcaaaagcaactccagatgttctctgtagacg  
atcttccacctgcccacgctagagcagccgtcgccgcagctaataaggagagccagggcaatggcttccgc  
cgaagcagctgccgagacattaggtgactttctaggacttggcaaggggtggattgagtcaggcgcgaacc  
gctaacttagatagagaacaagtgttaggtgttctttagggccgctatggagaaggggtgacttgaatttag  
aaagagcattgtatagccatgctaacgccgtcactaataaatactgtggaggcgggtgtgtattacagagg  
attagttgagttctctaactttgcccagaatgattgttcatattgcggtataaggaacaatcaaaaggag  
gtatggagatacacaatgcctgtcgaagaagtgtggagggttgcaaatgggccctagaaaacggcatca  
ggaatattatgcttcaggggtggagaacttaagaccgagcaaaagattagcttacctagaagcctgtgtaag  
agcaataagggaggaaactacacaattggatttagaaaatgagagctagagccgcacaccactacagct  
gagccgcagctagtgacaggtgacgcccgaagcaaaaaggggtgaaccagagcttggcgtcgtgggtta  
gcttgtctgtaggtgaattacctatggaacaatacagagagactattttagagctggagccaggagatattc  
taccaggattgaaacctcaaatccagattttgtacgcagctttacacctgaaccaatgtcctggcatgcc  
agagtcgagtgccataagaaacttgaagaaagcaggttatatgttaggactggagttatgggtggcccttc  
ctggccaaacattgcacgacttagctgggtgatgttatgttcttttagggatataaaggccgacatgatcgg  
aatgggtccattcattactcagcctggcaccaccagcaacagataaatggactgctctatacccaaatgct  
aacaagaatagtcataatgaaatctatgtttgacttgaccacagccatgaacgcattagtaagaattacta  
tgggtaattgtcaacataagcgcctacaaccgcccttcaagcaatcattcctactggaagagaaatagccct  
agagaggggtgccaatgtggttatgccaatcttgacacctactcagtatagagaatcataccaattatata  
gaaggcaagccatgtattaccgatacagcagtaacaatgtagaaggtgccttgatatgagattgcattccg  
tcggaaaaaccagtgctgccgggtgtttgggggtgacctgcatctttcttacaccaatagtggggcgttcc  
tgtaccacatgatcatcctcctgctttggccgcagctgccagcgcagactttcacgaggtcggagct  
ggtccatggaacctatcaggttagaaagacttggtagaagtgccagatagataacctgatccagacaatc  
atggtaggaaaaaggccggcgcagaaaaggcggcaaggtcacgattcccatgacgatggagatcatga  
cgatcaccatcaccatcatggtgcccaccagctgggtgccgcagctggcaaggaaccggtgccgcagct  
attggcggcggagccgggtgctagcagacagagagtagctggcggccgcagctgcctcagcaagggttgtgtg  
ctggagccagaagagcaggttagggctcgttgccttctcctctaagaccagccgcagcttgcaggggtgtggc  
cgttaaggcagctgctgccgcagctggcggaggacgccggagcaggtacaagcgggtgtaggctccaatatt  
gtcaccagtcctggaatagcttcaaccacagcccacgggtgttccaagaatcaacattggcgtgttcggag  
taatgaatgcaggtaaatctacttttagtcaacgctttggccaacaagaagcatgtatagttgatagcac  
ccctggtacaactgctgacgtcaagaccgttcttttagaactacatgcattgggccagctaaattactt

gatacagccggattggatgaggtaggtggtctagggcagacaagaaaagaaggaagggcattaaatactttga  
aagaatgcatgctcgctgttcttggtagacaccgatacagccgagctgccatcaaataccggaagatt  
agcagaggccctagaatgggaaagtaagggtcatggagcaggctcacaatacaacgtttcacctgtgttg  
ttattgaatgtaaagagcagagggcctccagaagcccaagcagccagcatgctagaagccggttcaggca  
tgttagatccttccaacagattccaaggatgctcattggacttagcttctactcctcttcatgagagaag  
tacaataacttagcgcctttgtcaaggaaggagcagttaggctcctcaagatacgggtgctccactacctggt  
tgtttgccaagatggtcttttaggcaggaacgccagattgcttatgggtgattccaatggatgcagaaaccc  
ctggaggtagactattaaggccacaagctcaagtaatggaggaagccatcagacactgggcaacagctctt  
gagtgtagattagacttggatgctgccaggggtaaaacttggccctgaagcatgtgagatggaaagacag  
aggttcgatggagtaattgctatgatggagagaaatgacgggtccaactctagttgtgaccgattctcaag  
ccatagacgctgcttcatccttggacattagatagatcctcaggcaggccattgggtgcctatcactacctt  
tagtattgcaatggcttatcaacagaacggaggtagactttagctcattttagagaaggcctagaagcctta  
gagacattgcaagacggcgatagagtcttaatatctgaagcatgcaatcataataggatcacttcagctt  
gtaacgacattggaatgggtcaaatacctaataagttggaagctgcacttgggtggtaaaaagctacagat  
tgagcacgctttcggcagagaatttccagaattagagtctggaggtatggatggcttgaaacttgccatc  
cattgctggaggttgtatgattgatgcacaaaagatgcagcaagaatgaaagacctacacgaagctgggtg  
tacctgttaccactatggcgtgttcttttagctgggcccagatggccagatgctttaaggagagccttggg  
accttggggagtcgagcctccagttggtacacctgcaactccagctgccgcacctgctaccgccgcatcc  
ggtgtgactagtagcggccgctgcag

>Cr .HydG; AAS92602

gcggccgcttctagaactgctcatggtaaaagcatctgccacaagagaatatgctggagatTTTTTgcccag  
gcaccactatttccacacgcatgggtccggttgagagggaaacacatcacagatacaggaatcctgccgagtg  
gataaacgaagctgcaatccataaggccttagaaaccagtaaaagctgacgcacaagatgctggtagagta  
agagagattctagccaaggcaaaagaaaaggctttcgtcactgaacacgccccagtgaaatgcagagagca  
aatctgaatttggttcagggacttacattggaagagtgtgctaccttaataaacgtagactcaaataacgt  
cgaactaatgaatgagatcttcgatactgcccttgcaattaaaggaaaggatataatggcaacagagtggtt  
ttggttctcctttatacatcgccaatcattgcatgaacacatgtacctattgctgcatccagatccgcta  
ataaaggatggaaggagttttttagctgacgatgatttaagagaggaagtagccgactacaaaggca  
gggtcatagaaggattcttgccttgacaggagaacacccaaagtacacttttgacaatttcttcatgct  
gtcaacgcttatagccagcgtgaaaaccgagcctgaaggctctatcaggagaatgaatggtgaaatcccac  
ctctatcagatccgatagagaagggtgaagaacacagacagtgctgggtacttttgggttattccaaga  
gacctatcacagagatacattttaaagttatgcatccatctggacctaaagagcagtttcgacttttagagta  
cttactcaagatagggcaatgagagctgggttggacgatgctggcagcgggtgcttatttggactatacg  
attataggtacgaagtttggcaatgctttagctcactcagaacatttggagagagaatataatgctggtcc  
acatacaatttccgtgcctagaatgagggcagccgacggcagtgagttatctatagcacctccataccca  
gttaacgatgctgacttcatgaagctagtagcagctcttgagaatcgtgtgcttataaccggtatgattt  
tatcaactagagaatctccagaaatgaggagcgcctttttaaagtgccgaatgtcccagatgagtgagg  
ttcaagaacagatggtggcgttaccacaaggatcactttatctaccgaggccaatctaagcaaatg  
gcaggacaatttaccattacaagacgaaagacctactaacgaaattgtaaagtggtttaggaggaaggtt  
atgtcccacctggtgtaccgcttgttacaggcagggcagaacaggtgaagatttcatgaatataatgcaa  
agccggagacatccacgatttttgcctcctaacagctctattgactttacaagagtatcttatggattac  
gcagaccagatttgaggaagaaaggtgaacaggttattgctagagagatgggcccagcctcagaac  
cattatctgcacaaagcagaaagaggctagaaagaaaaatgaagcaagtggtggaggggtgaacatgatgt  
ttatttaactagtagcggccg

>So .Fd; 1704156A

gcggccgcttctagagctgcatataaaagttactttggtaacaccaaccggtaatgtcgaatttcaatgct  
ctgatgacgtgtacatttttagacgccgctgaggaagagggaaatagatctaccatattcttgcagagcagg  
ctcatgctccagttgctgcccgttaagctttaaactggaagcttgaaccaggatgaccaatcttcttagat  
gatgaccagatcgatgaaggctgggttctaacaatgtgctgcataccctgtatcagacgtcaccattgaa  
ctcataaggaggaagaacttacagccactagtagcggccg

**Figure S1. Sequence of codon optimized commercially synthesized genes.** Gene names listed as Organism.Gene Name; GenBank Accession Number (Cr=*Chlamydomonas reinhardtii*, So=*Spinacia olearcea*)

| Gene         | GenBank Accession | Primer ( <i>Italics indicate Biobrick sites</i> )                 |
|--------------|-------------------|-------------------------------------------------------------------|
| Ca HydA 5'   | CAC3230           | <i>CCTTTCTAGA</i> ATGAAAACAATAATCTTAA                             |
| Ca HydA 3'   |                   | AAGGCTGCAGCGGCCGCTACTAGT TTCATGTTTTGAAACATTTTTA                   |
| Cs HydA 5'   | CAU09760          | <i>CCTTGAATTCGCGGCCGCATCTAGA</i> ATGATAAACATAGTAATTGATGAAA        |
| Cs HydA 3'   |                   | AAGGCTGCAGCGGCCGCTACTAGT TTTATTGTATTTAAGTGAATAAT                  |
| So HydA 5'   | SO_3920           | <i>CCTTGAATTCGCGGCCGCATCTAGA</i> ATGACAACGACAACCTATCAACCAG        |
| So HydA 3'   |                   | AAGGCTGCAGCGGCCGCTACTAGT AATGTTACCCAGCCATGAAGA GCCT               |
| So HydB 5'   | SO_3921           | <i>CCTTGAATTCGCGGCCGCATCTAGA</i> ATGAACAAGAAAAACACCTATTTG         |
| So HydB 3'   |                   | AAGGCTGCAGCGGCCGCTACTAGT AGAGCTTAATTTGGTGCATCGACA                 |
| Tm HydA 5'   | AF044577          | <i>CCTTGAATTCGCGGCCGCATCTAGA</i> ATGAAAATTTACGTTGATGGAAGAGAAGTTAT |
| Tm HydA 3'   |                   | AAGGCTGCAGCGGCCGCTACTAGT TCAGCCATTTTTCGAAAGCTCCTCCAGCACCTTCTC     |
| Ca PFOR 5'   | CAC2229           | <i>CCTTGAATTCGCGGCCGCATCTAGA</i> ATGAAAAAATGAAACTATGG             |
| Ca PFOR 3'   |                   | AAGGCTGCAGCGGCCGCTACTAGT TTATTGATTAGCTAATCTTT                     |
| Da PFOR 5'   | CAA70873          | AAACATATGGGAAAGAAAATGATGACG                                       |
| Da PFOR 3'   |                   | AAACCTAGGCTACTTCTTCGTCGCTTGC                                      |
| Ec ydbK 5'   | CAQ31878          | <i>CCTTGAATTCGCGGCCGCATCTAGA</i> ATTACTATTGACGGTAATGGCG           |
| Ec ydbK 3'   |                   | AAGGCTGCAGCGGCCGCTACTAGT TTAATCGGTGTTGCTTTTTTCCGC                 |
| Ca Fd 5'     | CAC0303           | <i>CCTTGAATTCGCGGCCGCATCTAGA</i> ATGGCATATAAATAACAGA              |
| Ca Fd 3'     |                   | AAGGCTGCAGCGGCCGCTACTAGT CTCTTGAAGTGGAGCTCCTA                     |
| Zm Fd 5'     | EU956042          | <i>CCTTGAATTCGCGGCCGCATCTAGA</i> ATGGCTGTATACAAGGTGAAGCTTG        |
| Zm Fd 3'     |                   | AAGGCTGCAGCGGCCGCTACTAGT CAGGTCGCCTTCCTTGTGGGTGTGG                |
| Ca mut. 5'   |                   | GTGGACAATGTTCCAGAAGAGAAAATTGTGAGTTCCTTAAACTTG                     |
| Cs mut. 5'   |                   | GCAGCAAACCTAGCTGAGTTCATGAATAGCGG                                  |
| SoB mut.     |                   | CGCGGTAGAAAAGTACTACAAAGAGTTCGGTGGCGAGCCATTAGGACATATGTCCC          |
| CrHydA P2K   |                   | CCGCTTCTAGAGCTGCAAAGGCCGCAGAAAGCTCCTTTGTC                         |
| CrHydA D126K |                   | CGCTATGTTAGAAAAAGCTATCCTAAGCTAATTCCATACGTGAGC                     |
| CrHydA E5K   |                   | CCGCTTCTAGAGCTGCACCAGCCGCAAAGGCTCCTTTGTC                          |
| CrHydA M119K |                   | CCAGGTTGGATCGCTAAGTTAGAAAAAGCTATCC                                |

**Table S1: Primers used for cloning and mutagenesis of heterologous pathway components**





```

Ca      INGAS-NLFKFMKSGMINEKQYHFIEVMACHGGCVNGGGQPHVNPkdLEKVDIKKVRASV 529
Cs      INGAA-NLAEFMNSGKILEKQYHFIEVMACPGGCVNGGGQPHVSAKEREKVDVVRTVRASV 529
Cr      ANGLG-NAKKLITKMQAGEAKYDFVEIMACPAGCVGGGQPRSTDKA-----ITQKRQAA 385
So      VHDMGNNIEPVLRDVMAGTSPYHFIEVMNCAGGCVNGGGQP-----IEGKSSW 512
Tm      IYGLG-----KVKKFLEERKDVEIIEVMACNYGCVGGGQPYPNDSR-----IREHRAKV 507
      . .      : .      . : : * : * * * * . * * * * *      :

Ca      LYNQDEHLSKRKSHENTALVKMYQNYFGKPGEGRAHEILHFYK----- 574
Cs      LYNQDNLEKRKSHKNTALLNMYDYMGAPGQGAHELLHLKYNK----- 574
Cr      LYNLDEKSTLRRSHENPSIRELYDTYLGEPLGHKAHELLHHTHYVAGGVEEKDEKKTSSGR 445
So      LGNI----- 516
Tm      LRDTMGIKSLTPVENLFLMKLYEEDLKD--EHRHEILHTTYRPRRRYPEKDVEILPVP 565
      * :

Ca      -----
Cs      -----
Cr      C----- 446
So      -----
Tm      NGEKRTVKVCLGTSCYTKGSYEILKKLVQVYKENDMEGKIEVLGTFVENCASPNIIVD 625

Ca      -----
Cs      -----
Cr      -----
So      -----
Tm      DKIIIGGATFEKVLLEELSKNG 645

```

**Figure S3. Sequence alignment of five hydrogenases** Protein sequences of *Clostridium acetobutylicum* (Ca), *Clostridium saccharobutylicum* (Cs), *Chlamydomonas reinhardtii* (Cr), and *Thermotoga maritima* (Tm) HydA and *Shewanella oneidensis* HydB + HydA aligned using ClustalW web server (<http://www.ebi.ac.uk/Tools/clustalw/>). Catalytic site binding area highlighted in bold with critical cysteine residues in red.

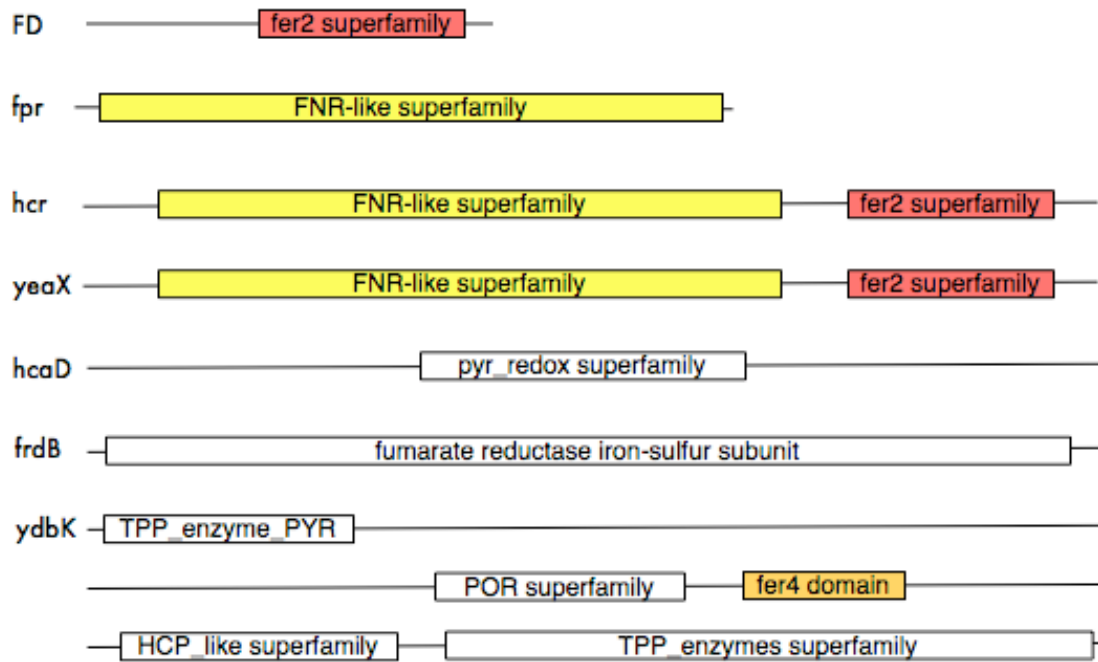

**Figure S4. Deletion of competing reactions leads to hydrogen circuit insulation.** A.) Domain structure of deleted ferredoxin-homology genes. FD-ferredoxin; fpr-flavodoxin:NADP<sup>+</sup> reductase; hcr-NADH oxidoreductase; yeaX-predicted oxidoreductase; hcaD-ferredoxin:NAD<sup>+</sup> reductase; frdB-fumarate reductase; ydbK-putative pyruvate-ferredoxin oxidoreductase. Genes were identified by BLAST homology search of the *Escherichia coli* genome against *Spinacia olearcea* ferredoxin I. Domain structure schematized from NCBI conserved domain search.
